# Supplementary material for: Measurement report: Brown carbon aerosol in polluted urban air of the North China Plain – day–night differences in the chromophores and optical properties
Source: Copernicus journal article supplement (doi:10.5194/acp-23-15197-2023), 2023-12-14
Supplement: Supplementary file 1 [file acp-23-15197-2023-supplement.pdf]

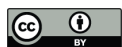

*Supplement of*

**Measurement report: Brown carbon aerosol in polluted urban air of the North China Plain – day–night differences in the chromophores and optical properties**

**Yuquan Gong et al.**

*Correspondence to:* Ru-Jin Huang ([rujin.huang@ieecas.cn](mailto:rujin.huang@ieecas.cn))

The copyright of individual parts of the supplement might differ from the article licence.

17 **Table S1.** Retention Times (RTs), Abbreviation, Elemental Formulas, and Assigned Structures of  
 18 Identified BrC Chromophores. (\*) represent tentative structure components.

| Peak # | RT (min) | m/z & ion. Mech.              | Formula                                       | Name (Abbreviation)              | Unambiguous/Tentative structure (*)                                                       | Quantified with                           |
|--------|----------|-------------------------------|-----------------------------------------------|----------------------------------|-------------------------------------------------------------------------------------------|-------------------------------------------|
| 1#     | 1.69     | 130.0652 [M + H] <sup>+</sup> | C <sub>9</sub> H <sub>7</sub> N               | Isoquinoline (ISO)               | 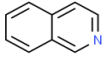 (*)   | surrogates (QUI)                          |
| 2#     | 2.03     | 130.0652 [M + H] <sup>+</sup> | C <sub>9</sub> H <sub>7</sub> N               | Quinoline (QUI)                  |        | standards                                 |
| 3#     | 6.06     | 165.0192 [M - H] <sup>-</sup> | C <sub>8</sub> H <sub>6</sub> O <sub>4</sub>  | Phthalic acid (PA)               |        | standards                                 |
| 4#     | 7.21     | 154.0144 [M - H] <sup>-</sup> | C <sub>6</sub> H <sub>5</sub> NO <sub>4</sub> | 4-nitrocatechol (4NC)            |        | standards                                 |
| 5#     | 7.87     | 153.0544 [M + H] <sup>+</sup> | C <sub>8</sub> H <sub>8</sub> O <sub>3</sub>  | vanillin (VAN)                   |        | standards                                 |
| 6#     | 9.15     | 163.0401 [M - H] <sup>-</sup> | C <sub>9</sub> H <sub>8</sub> O <sub>3</sub>  | p-cis-coumaric acid (PCCA)       |  (*)   | surrogates (PA)                           |
| 7#     | 11.48    | 138.0195 [M - H] <sup>-</sup> | C <sub>6</sub> H <sub>5</sub> NO <sub>3</sub> | 4-nitrophenol (4NP)              |       | standards                                 |
| 8#     | 13.53    | 168.0301 [M - H] <sup>-</sup> | C <sub>7</sub> H <sub>7</sub> NO <sub>4</sub> | 4-methyl-5-nitrocatechol (4M5NC) |      | standards                                 |
| 9#     | 13.82    | 168.0302 [M - H] <sup>-</sup> | C <sub>7</sub> H <sub>7</sub> NO <sub>4</sub> | 3-methyl-6-nitrocatechol (3M6NC) |  (*) | surrogates (4M5NC)                        |
| 10#    | 16.06    | 198.0406 [M - H] <sup>-</sup> | C <sub>8</sub> H <sub>9</sub> NO <sub>5</sub> | 4-nitrosyringol (4NS)            |  (*) | surrogates (3M5NC)                        |
| 11#    | 18.23    | 168.0301 [M - H] <sup>-</sup> | C <sub>7</sub> H <sub>7</sub> NO <sub>4</sub> | 3-methyl-5-nitrocatechol (3M5NC) |      | standards                                 |
| 12#    | 18.72    | 171.0451 [M - H] <sup>-</sup> | C <sub>11</sub> H <sub>8</sub> O <sub>2</sub> | 1-Formyl-2-naphthol (1F2N)       |  (*) | surrogates (5-hydroxy-1,4-naphthoquinone) |
| 13#    | 19.43    | 152.0352 [M - H] <sup>-</sup> | C <sub>7</sub> H <sub>7</sub> NO <sub>3</sub> | 3-methyl-4-nitrophenol (3M4NP)   |      | standards                                 |
| 14#    | 20.06    | 183.0440 [M + H] <sup>+</sup> | C <sub>12</sub> H <sub>6</sub> O <sub>2</sub> | 1,2-acenaphthylenedione (1,2ACE) |  (*) | surrogates (1,8NA)                        |

19

| Peak # | RT (min) | m/z & ion. Mech.              | Formula                                       | Name (Abbreviation)                        | Unambiguous/Tentative structure (*)                                                       | Quantified with          |
|--------|----------|-------------------------------|-----------------------------------------------|--------------------------------------------|-------------------------------------------------------------------------------------------|--------------------------|
| 15#    | 20.53    | 199.0389 [M + H] <sup>+</sup> | C <sub>12</sub> H <sub>6</sub> O <sub>3</sub> | 1,8-naphthalic anhydride (1,8NA)           |        | standards                |
| 16#    | 21.95    | 152.0352 [M - H] <sup>-</sup> | C <sub>7</sub> H <sub>7</sub> NO <sub>3</sub> | 2-methyl-4-nitrophenol (2M4NP)             |        | standards                |
| 17#    | 26.08    | 166.0509 [M - H] <sup>-</sup> | C <sub>8</sub> H <sub>9</sub> NO <sub>3</sub> | 2,6-Dimethyl-4-nitrophenol (2,6D4NP)       |        | standards                |
| 18#    | 26.39    | 166.0509 [M - H] <sup>-</sup> | C <sub>8</sub> H <sub>9</sub> NO <sub>3</sub> | 3,5-Dimethyl-4-nitrophenol (3,5D4NP)       |  (*)   | surrogates (2,6D4NP)     |
| 19#    | 27.12    | 181.0648 [M + H] <sup>+</sup> | C <sub>13</sub> H <sub>8</sub> O              | 9-fluorenone (9FLU)                        |        | standards                |
| 20#    | 28.21    | 166.0509 [M - H] <sup>-</sup> | C <sub>8</sub> H <sub>9</sub> NO <sub>3</sub> | 2,3-Dimethyl-4-nitrophenol (2,3D4NP)       |  (*)   | surrogates (2,6D4NP)     |
| 21#    | 36.93    | 231.0806 [M + H] <sup>+</sup> | C <sub>17</sub> H <sub>10</sub> O             | Benzanthrone (BEN)                         |        | standards                |
| 22#    | 38.41    | 231.0801 [M + H] <sup>+</sup> | C <sub>17</sub> H <sub>10</sub> O             | Benzo[b]fluoren-11-one (BbF11O)            |        | standards                |
| 23#    | 39.27    | /                             | C <sub>14</sub> H <sub>10</sub>               | Phenanthrene (PHE)                         |      | standards                |
| 24#    | 39.88    | /                             | C <sub>14</sub> H <sub>10</sub>               | Anthracene (ANT)                           |      | standards                |
| 25#    | 41.23    | /                             | C <sub>16</sub> H <sub>10</sub>               | Fluoranthene (FLU)                         |      | standards                |
| 26#    | 41.7     | /                             | C <sub>16</sub> H <sub>10</sub>               | Pyrene (PYR)                               |      | standards                |
| 27#    | 42.48    | /                             | C <sub>16</sub> H <sub>10</sub> O             | Benzo[b]naphtho[1,2-d]furan (BbN[1,2d]F)   |      | standards                |
| 28#    | 43.46    | /                             | C <sub>18</sub> H <sub>12</sub>               | Chrysene (CHR)                             |      | standards                |
| 29#    | 43.63    | /                             | C <sub>18</sub> H <sub>12</sub>               | Benz(a)anthracene (BaA)                    |      | standards                |
| 30#    | 44.94    | /                             | C <sub>20</sub> H <sub>12</sub>               | Benzo(j)fluoranthene (BjF)                 |      | standards                |
| 31#    | 45.23    | /                             | C <sub>20</sub> H <sub>12</sub>               | Benzo(e)pyrene (BeP)                       |      | standards                |
| 32#    | 45.29    | /                             | C <sub>20</sub> H <sub>12</sub>               | Benzo(b)fluoranthene (BbF)                 |      | standards                |
| 33#    | 45.46    | /                             | C <sub>20</sub> H <sub>12</sub>               | Benzo(k)fluoranthene (BkF)                 |      | standards                |
| 34#    | 45.79    | /                             | C <sub>20</sub> H <sub>12</sub>               | Benzo(a)pyrene (BaP)                       |      | standards                |
| 35#    | 46.73    | /                             | C <sub>22</sub> H <sub>12</sub>               | Indeno[1,2,3-cd]fluoranthene (I[1,2,3cd]F) |  (*) | surrogates (I[1,2,3cd]P) |

| Peak # | RT (min) | m/z & ion. Mech. | Formula                         | Name (Abbreviation)                  | Unambiguous/Tentative structure (*)                                                     | Quantified with          |
|--------|----------|------------------|---------------------------------|--------------------------------------|-----------------------------------------------------------------------------------------|--------------------------|
| 36#    | 47.43    | /                | C <sub>22</sub> H <sub>12</sub> | Indeno(1,2,3-cd)pyrene (I[1,2,3cd]P) | 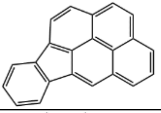     | standards                |
| 37#    | 47.53    | /                | C <sub>22</sub> H <sub>12</sub> | Benzo(g,h,i)perylene (B(g,h,i)P)     |      | standards                |
| 38#    | 48.25    | /                | C <sub>22</sub> H <sub>12</sub> | Anthanthrene (ANTHA)                 |  (*) | surrogates (I[1,2,3cd]P) |

21

22 **Note:** In this study, for chromophores with standards (28 chromophores), unambiguous

23 structures were identified with the standards; for chromophores without standards (10

24 chromophores), it was assigned by comparing with the reference UV-Vis spectrum.

25 **Table S2.** Average ( $\pm$  standard deviation) values  $Abs_{365nm}$ ,  $MAE_{365nm}$ , and AAE of WS-BrC and WIS-BrC, as well as concentrations of WSOC and WISOC,  
 26 measured organic species in the PM 2.5 aerosols from the urban. <sup>a</sup> represents the determination of the HULIS extraction solution. Here  $Abs_{365, MS-BrC}$  is the  
 27 light absorption coefficient of methanol-soluble BrC at 365 nm.

| Components                                                        | This study        |                   | Li et al. (2020) |                 | Huang et al. (2020)            |                               | Li et al. (2021) |                 |
|-------------------------------------------------------------------|-------------------|-------------------|------------------|-----------------|--------------------------------|-------------------------------|------------------|-----------------|
|                                                                   | Day               | Night             | Day              | Night           | Xi'an                          | Beijing                       | Day              | Night           |
| <b>WSOC (<math>\mu\text{g m}^{-3}</math>)</b>                     | 17.29 $\pm$ 14.49 | 12.90 $\pm$ 13.36 | 22.1 $\pm$ 8.0   | 21.7 $\pm$ 10.4 | 12.4 $\pm$ 6.50 <sup>a</sup>   | 6.4 $\pm$ 3.80 <sup>a</sup>   | /                | /               |
| <b>WISOC (<math>\mu\text{g m}^{-3}</math>)</b>                    | 29.78 $\pm$ 22.39 | 31.07 $\pm$ 12.47 | 21.9 $\pm$ 10.1  | 26.2 $\pm$ 17.3 | 20.80 $\pm$ 7.90               | 16.30 $\pm$ 8.90              | /                | /               |
| <b><math>Abs_{365, WS-BrC}</math> (<math>Mm^{-1}</math>)</b>      | 46.04 $\pm$ 38.91 | 35.68 $\pm$ 35.50 | 19.2 $\pm$ 6.8   | 19.9 $\pm$ 9.5  | 31.50 $\pm$ 16.40 <sup>a</sup> | 15.00 $\pm$ 9.50 <sup>a</sup> | /                | /               |
| <b><math>Abs_{365, MS-BrC}</math> (<math>Mm^{-1}</math>)</b>      | 79.86 $\pm$ 66.50 | 82.69 $\pm$ 55.84 | /                | /               | /                              | /                             | 50.0 $\pm$ 5.00  | 75.0 $\pm$ 7.50 |
| <b><math>Abs_{365, WIS-BrC}</math> (<math>Mm^{-1}</math>)</b>     | 27.90 $\pm$ 24.80 | 40.88 $\pm$ 23.42 | 17.2 $\pm$ 8.2   | 26.7 $\pm$ 15.8 | 33.90 $\pm$ 16.40              | 26.10 $\pm$ 18.40             |                  |                 |
| <b><math>MAE_{365, WS-BrC}</math> (<math>m^2g C^{-1}</math>)</b>  | 2.58 $\pm$ 0.14   | 2.88 $\pm$ 0.24   | 0.92 $\pm$ 0.21  | 0.94 $\pm$ 0.28 | 1.80 $\pm$ 0.30 <sup>a</sup>   | 1.80 $\pm$ 0.40 <sup>a</sup>  | /                | /               |
| <b><math>MAE_{365, WIS-BrC}</math> (<math>m^2g C^{-1}</math>)</b> | 1.02 $\pm$ 0.49   | 1.43 $\pm$ 0.83   | 0.85 $\pm$ 0.34  | 1.05 $\pm$ 0.28 | 1.50 $\pm$ 0.50                | 1.50 $\pm$ 0.40               | 1.73 $\pm$ 0.64  | 2.13 $\pm$ 0.65 |
| <b><math>AAE_{WS-BrC}</math></b>                                  | 5.10 $\pm$ 0.28   | 5.51 $\pm$ 0.40   | 5.14 $\pm$ 0.2   | 5.07 $\pm$ 0.72 | 8.20 $\pm$ 1.00                | 9.40 $\pm$ 2.60               | /                | /               |
| <b><math>AAE_{WIS-BrC}</math></b>                                 | 6.36 $\pm$ 0.45   | 6.97 $\pm$ 0.80   | 5.94 $\pm$ 0.12  | 6.15 $\pm$ 0.24 | 5.4 $\pm$ 0.20                 | 5.7 $\pm$ 0.20                | 5.16 $\pm$ 1.15  | 4.07 $\pm$ 0.87 |

29 **Table S3.** The concentrations of day and night mass of the 38 identified BrC chromophores.

30

| Name                         | Mass concentration (ng m <sup>-3</sup> ) |             |
|------------------------------|------------------------------------------|-------------|
|                              | Day                                      | Night       |
| Isoquinoline                 | 2.7 ± 1.0                                | 2.0 ± 1.3   |
| Quinoline                    | 6.7 ± 7.7                                | 5.3 ± 4.5   |
| 1-Formyl-2-naphthol          | 6.8 ± 5.6                                | 1.8 ± 1.2   |
| 1,2-acenaphthylenedione      | 12.6 ± 10.8                              | 7.6 ± 5.9   |
| 1,8-naphthalic anhydride     | 8.2 ± 7.6                                | 1.8 ± 1.2   |
| 9-fluorenone                 | 0.6 ± 0.4                                | 0.7 ± 0.4   |
| 4-nitrocatechol              | 20.7 ± 18.9                              | 11.2 ± 7.7  |
| 4-methyl-5-nitrocatechol     | 6.6 ± 6.1                                | 5.8 ± 3.3   |
| 3-methyl-6-nitrocatechol     | 1.3 ± 0.6                                | 1.0 ± 0.4   |
| 3-methyl-5-nitrocatechol     | 10.9 ± 11.0                              | 2.8 ± 3.2   |
| 4-nitrophenol                | 20.2 ± 14.7                              | 41.9 ± 29.4 |
| 3-methyl-4-nitrophenol       | 2.2 ± 1.5                                | 5.6 ± 3.3   |
| 2-methyl-4-nitrophenol       | 2.0 ± 1.5                                | 8.1 ± 4.6   |
| 2,6-Dimethyl-4-nitrophenol   | 0.6 ± 0.4                                | 2.4 ± 1.4   |
| 3,5-Dimethyl-4-nitrophenol   | 0.4 ± 0.2                                | 2.5 ± 1.3   |
| 2,3-Dimethyl-4-nitrophenol   | 0.6 ± 0.5                                | 1.2 ± 0.6   |
| Phthalic acid                | 25.1 ± 12.9                              | 12.1 ± 6.3  |
| vanillin                     | 4.1 ± 1.6                                | 3.8 ± 2.8   |
| p-cis-coumaric acid          | 2.9 ± 1.5                                | 4.6 ± 2.6   |
| 4-nitrosyringol              | 5.8 ± 4.8                                | 6.3 ± 3.2   |
| Benzanthrone                 | 0.5 ± 0.4                                | 0.5 ± 0.3   |
| Benzo[b]fluoren-11-one       | 0.2 ± 0.2                                | 0.2 ± 0.1   |
| Benzo[b]naphtho[1,2-d]furan  | 0.1 ± 0.1                                | 0.2 ± 0.1   |
| Phenanthrene                 | 1.3 ± 1.2                                | 1.1 ± 0.8   |
| Anthracene                   | 0.5 ± 0.4                                | 0.5 ± 0.4   |
| Fluoranthene                 | 4.4 ± 4.0                                | 7.9 ± 7.8   |
| Pyrene                       | 3.4 ± 3.1                                | 4.8 ± 3.4   |
| Chrysene                     | 3.8 ± 4.2                                | 8.0 ± 5.5   |
| Benzo(a)anthracene           | 1.7 ± 1.4                                | 3.5 ± 2.0   |
| Benzo(j)fluoranthene         | 0.2 ± 0.2                                | 0.3 ± 0.1   |
| Benzo(e)pyrene               | 3.2 ± 3.0                                | 5.2 ± 3.6   |
| Benzo(b)fluoranthene         | 2.3 ± 2.1                                | 2.6 ± 1.6   |
| Benzo(k)fluoranthene         | 2.5 ± 2.5                                | 3.7 ± 2.5   |
| Benzo(a)pyrene               | 1.4 ± 1.3                                | 1.7 ± 1.3   |
| Indeno[1,2,3-cd]fluoranthene | 0.7 ± 0.6                                | 0.9 ± 0.6   |
| Indeno(1,2,3-cd)pyrene       | 1.3 ± 1.2                                | 1.3 ± 0.5   |
| Benzo(g,h,i)perylene         | 0.7 ± 0.6                                | 0.9 ± 0.7   |
| Anthanthrene                 | 0.3 ± 0.3                                | 0.4 ± 0.3   |

31

32

33 **Table S4.** The identified 38 BrC chromophores are divided into ten subgroups.  
34

| Categories | Subgroups                   | Name                         |
|------------|-----------------------------|------------------------------|
| I          | quinolines                  | Isoquinoline                 |
|            |                             | Quinoline                    |
| II         | 2-3-ring OPAHs              | 1-Formyl-2-naphthol          |
|            |                             | 1,2-acenaphthylenedione      |
|            |                             | 1,8-naphthalic anhydride     |
|            |                             | 9-fluorenone                 |
| III        | nitrocatechols              | 4-nitrocatechol              |
|            |                             | 4-methyl-5-nitrocatechol     |
|            |                             | 3-methyl-6-nitrocatechol     |
|            |                             | 3-methyl-5-nitrocatechol     |
| IV         | nitrophenols                | 4-nitrophenol                |
|            |                             | 3-methyl-4-nitrophenol       |
|            |                             | 2-methyl-4-nitrophenol       |
|            |                             | 2,6-Dimethyl-4-nitrophenol   |
|            |                             | 3,5-Dimethyl-4-nitrophenol   |
|            |                             | 2,3-Dimethyl-4-nitrophenol   |
| V          | aromatic alcohols and acids | Phthalic acid                |
|            |                             | vanillin                     |
|            |                             | p-cis-coumaric acid          |
|            |                             | 4-nitrosyringol              |
| VI         | 4-ring OPAHs                | Benzanthrone                 |
|            |                             | Benzo[b]fluoren-11-one       |
|            |                             | Benzo[b]naphtho[1,2-d]furan  |
| VII        | 3-ring PAHs                 | Phenanthrene                 |
|            |                             | Anthracene                   |
| VIII       | 4-ring PAHs                 | Fluoranthene                 |
|            |                             | Pyrene                       |
|            |                             | Chrysene                     |
|            |                             | Benzo(a)anthracene           |
|            |                             | Benzo(j)fluoranthene         |
| IX         | 5-ring PAHs                 | Benzo(e)pyrene               |
|            |                             | Benzo(b)fluoranthene         |
|            |                             | Benzo(k)fluoranthene         |
|            |                             | Benzo(a)pyrene               |
|            |                             | Indeno[1,2,3-cd]fluoranthene |
| X          | 6-ring PAHs                 | Indeno(1,2,3-cd)pyrene       |
|            |                             | Benzo(g,h,i)perylene         |
|            |                             | Anthanthrene                 |

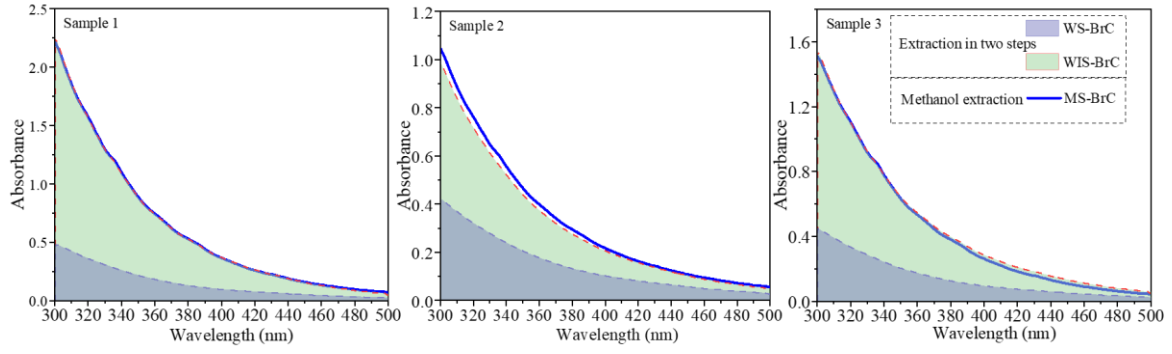

35

36 **Figure S1.** Comparison of the UV-Vis spectra of BrC extracts between sequential extraction with

37 water and methanol and direct extraction with methanol.

38

39

40

41

42

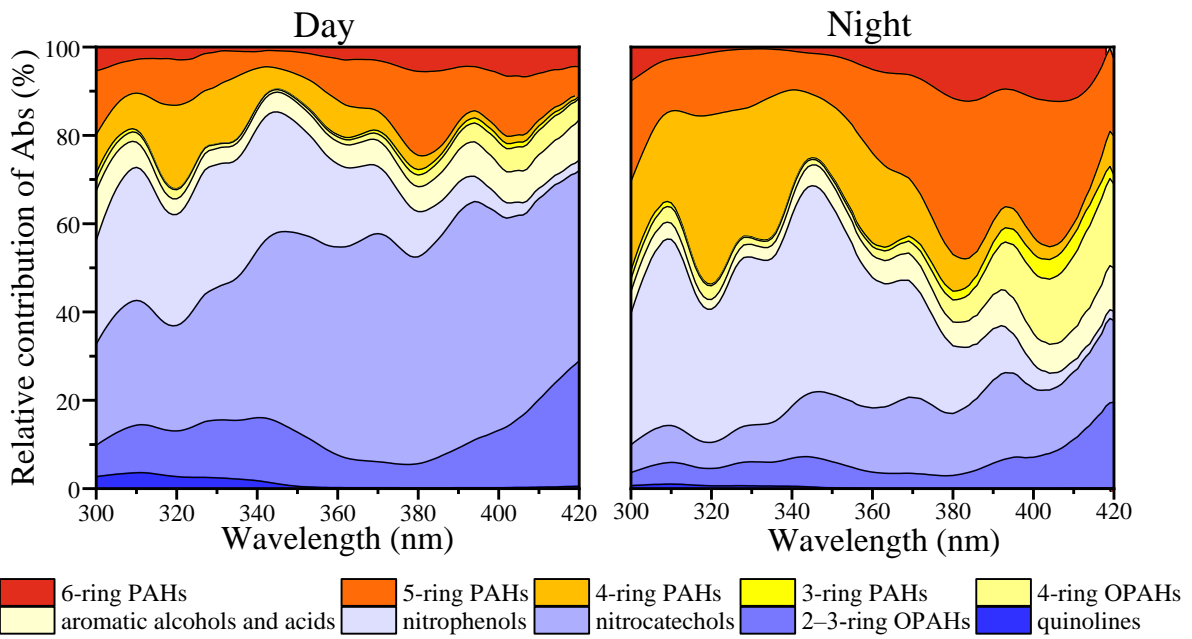

43

44 **Figure S2.** Relative contributions of light absorption of ten BrC subgroups during the day and night.

45

46

47



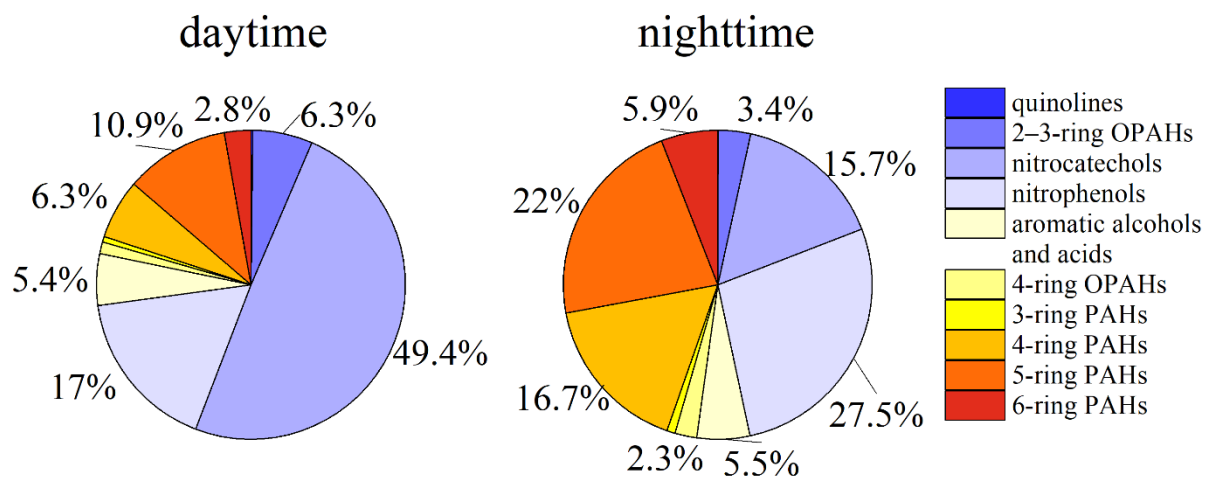

48  
 49 **Figure S3.** Light-absorbing contributions of ten BrC subgroups at 365nm in the daytime and  
 50 nighttime.  
 51

52  
 53

54 **References**

- 55 Huang, R.-J., Yang, L., Shen, J., Yuan, W., Gong, Y., Guo, J., Cao, W., Duan, J., Ni, H., & Zhu, C. Water-  
56 insoluble organics dominate brown carbon in wintertime urban aerosol of China: chemical characteristics  
57 and optical properties. *Environ. Sci. Technol.*, 54(13), 7836-7847, 2020.
- 58 Li, J., Zhang, Q., Wang, G., Li, J., Wu, C., Liu, L., Wang, J., Jiang, W., Li, L., & Ho, K. F. Optical properties  
59 and molecular compositions of water-soluble and water-insoluble brown carbon (BrC) aerosols in  
60 northwest China. *Atmos. Chem. Phys.*, 20(8), 4889-4904, 2020.
- 61 Li, X., Zhao, Q., Yang, Y., Zhao, Z., Liu, Z., Wen, T., Hu, B., Wang, Y., Wang, L., & Wang, G. Composition  
62 and sources of brown carbon aerosols in megacity Beijing during the winter of 2016. *Atmos. Res.*, 262,  
63 105773, 2021.
- 64
